# Supplementary material for: Maize Apoplastic Fluid Bacteria Alter Feeding Characteristics of Herbivore (Spodoptera frugiperda) in Maize
Source: MDPI journal article supplement (doi:10.3390/microorganisms10091850), 2022-09-16
Supplement: s1 [file s1]

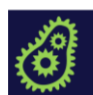

# Supplementary Material

**Table S1.** Isolation of maize (COH6) leaf and root apoplastic bacteria.

| Medium Employed | Leaf Apoplastic Fluid (LAF) Isolates | Root Apoplastic Fluid (RAF) Isolates |
|-----------------|--------------------------------------|--------------------------------------|
| 100% NA         | LAF4, LAF8, LAF9                     | RAF1, RAF5                           |
| 50% NA          | L6                                   | nd                                   |
| 25% NA          | nd                                   | nd                                   |
| 100% LA         | LAF5, LAF1                           | RAF2, RAF6                           |
| 50% LA          | nd                                   | R3                                   |
| 25% LA          | nd                                   | nd                                   |
| 100% TSA        | LAF7                                 | RAF4                                 |
| 50% TSA         | nd                                   | nd                                   |
| 25% TSA         | nd                                   | nd                                   |
| 100% R2A        | LAF2                                 | nd                                   |
| 50% R2A         | nd                                   | nd                                   |
| 25% R2A         | nd                                   | nd                                   |
| Total isolates  | 8                                    | 6                                    |

Values are the mean  $\pm$  standard deviation of experimental data in triplicate. NA, Nutrient Agar; LA, Lysogeny Agar; TSA, Tryptic Soy Agar; R2A, Reasoner's 2A Agar; nd, not detected.

**Table S2.** Morphological characteristic of isolated apoplastic fluid bacteria.

| Isolates | Colony Morphology                                              |
|----------|----------------------------------------------------------------|
| LAF 1    | Rod, gram positive, buff pigment, irregular, undulated, opaque |
| LAF 2    | Rod, gram negative, creamy, opaque                             |
| LAF 3    | Cocci, irregular, opaque, gram negative                        |
| LAF 4    | Rod, gram positive, small colonies, white, irregular, opaque   |
| LAF 5    | Rod, gram positive, irregular, opaque                          |
| LAF 6    | Cocci, gram positive, white, opaque                            |
| LAF 7    | Rod, gram positive, white, irregular, opaque, filamentous      |
| LAF 8    | Rod, gram negative, white, irregular, filamentous              |
| LAF 9    | Cocci, gram negative, large colony, white, creamy, yellow      |
| RAF 1    | Cocci, gram negative, large colony, white, creamy, opaque      |
| RAF 2    | Cocci, gram negative, creamy white, opaque                     |
| RAF 3    | Cocci, gram positive, small colonies, opaque, creamy           |
| RAF 4    | Cocci, gram negative, large colony, creamy, opaque             |
| RAF 5    | Rod, gram positive, light yellow, creamy, entire opaque        |
| RAF 6    | Rod, gram negative, regular, white, opaque                     |

LAF, Leaf Apoplastic Fluid; RAF, Root Apoplastic Fluid.
